# Supplementary material
Source: MDPI journal article supplement (https://www.mdpi.com/2075-163X/13/9/1165)
Supplement: s1 [file s1]

**Table S1** Summary of samples collected from the Pusangguo deposit in this study.

| Sample no.  | Type of ore                      | Drillhole Location    | Description/Ore textures                                                                                                                                                                             | Mineralogy   |
|-------------|----------------------------------|-----------------------|------------------------------------------------------------------------------------------------------------------------------------------------------------------------------------------------------|--------------|
| ZK004-23.4  | Massive Cu-Zn ore                | ZK004 at 23.4 meters  | Coexisting coarse-grained Ccp and Sp; a little fine-grained Py at the margin of Sp                                                                                                                   | Ccp>Sp>Py    |
| ZK004-79.9  | Disseminated Zn-Pb ore           | ZK004 at 79.9 meters  | Black brown coarse-grained Sp and coarse-grained irregular galena; a little irregular Ccp as inclusions in Sp                                                                                        | Sp>Gn>Ccp    |
| ZK004-90.5  | Banded Pb-Zn ore                 | ZK004 at 90.5 meters  | Light brown coarse-grained Sp and coarse-grained Gn; Gn cutting and replacing Sp; Py at the margin of Sp or in the fractures                                                                         | Sp>Gn>Py     |
| ZK002-24.5  | Massive Zn-Cu ore                | ZK002 at 24.5 meters  | High grade Sp-Ccp ore; a small amount of late carbonate veinlets                                                                                                                                     | Sp>Ccp       |
| ZK002-66.2  | Sparse disseminated Zn-Fe-Pb ore | ZK002 at 66.2 meters  | Coexisting fine-grained Sp and Gn; Gn as small inclusions in Sp; Coarse euhedral Py at the margin of Gn and Sp                                                                                       | Sp>Gn>Sp     |
| ZK002-86.2  | Laminated Zn-Cu-Fe ore           | ZK002 at 86.2 meters  | Light brown coarse Sp and euhedral Py; subhedral to euhedral Py as inclusions in Ccp; a little Ccp in the fractures of Py                                                                            | Sp>Ccp>Py    |
| ZK002-109.5 | Massive Cu-Fe-Zn ore             | ZK002 at 109.5 meters | Coexisting coarse-grained Ccp and subhedral-euhedral Py; euhedral Py as inclusions in Ccp or Ccp in the fractures of subhedral Py; a small amount of Ccp as inclusions in Sp                         | Ccp>Py>Sp    |
| ZK504-108.6 | Banded Zn-Fe-Cu ore              | ZK504 at 108.6 meters | Late veinlet Sp interspersed early Py-Ccp ore; coexisting euhedral Py and Ccp; partial replacement of medium- to fine grained euhedral to subhedral Py by Ccp or Sp; a little Gn as inclusions in Sp | Sp>Py>Ccp>Gn |
| ZK504-132.7 | Veinlet Fe-Cu ore                | ZK504 at 132.7 meters | Coarse euhedral Py veins and fine-grained Ccp veins occur alternately                                                                                                                                | Py>Ccp       |

|             |                                 |                       |                                                                                                                                                |              |
|-------------|---------------------------------|-----------------------|------------------------------------------------------------------------------------------------------------------------------------------------|--------------|
| ZK505-374.5 | Disseminated Cu-Fe-Pb-Zn ore    | ZK505 at 374.5 meters | Coexisting subhedral to euhedral Py and coarse-grained Ccp; a little Ccp as inclusions in Sp; partial replacement of Py by irregular Ccp       | Sp>Py>Gn>Ccp |
| ZK001-131.7 | Veinlet Fe-Zn-Pb ore            | ZK001 at 131.7 meters | Early coarse subhedral to euhedral Py veins and fine-grained Sp-Gn veins occur alternately; smooth boundary between Sp and Gn                  | Py>Sp>Gn     |
| ZK005-202.3 | Dense disseminated Cu-Zn-Fe ore | ZK005 at 202.3 meters | Coexisting coarse-grained Ccp and fine-grained Sp; fine-grained Py at the margin of Ccp and Sp                                                 | Ccp>Sp>Py    |
| ZK501-258.2 | Veinlet Zn-Cu-Fe-Pb ore         | ZK501 at 258.2 meters | Coarse-grained Ccp veins, subhedral coarse-grained Py veins and fine-grained Sp veins occur alternately; a little Gn as patchiness in Sp veins | Sp>Ccp>Py>Gn |

Mineral abbreviations: Ccp-chalcopyrite, Sp-sphalerite, Py-pyrite, Gn-galena. "Mineralogy" column contains only metallic minerals and is in the order of abundance.

**Table S2** EPMA major element compositions for sphalerite from the Pusangguo deposit (wt%).

| Sample        | Sphalerite | As   | Se   | S     | Pb   | Bi   | Ag   | Fe   | Co   | Ni   | Cu   | Zn    | Total  |
|---------------|------------|------|------|-------|------|------|------|------|------|------|------|-------|--------|
| ZK002-24.5-1  | SpI        | 0.01 | 0.00 | 33.35 | 0.00 | 0.00 | 0.00 | 5.93 | 0.25 | 0.00 | 0.03 | 60.27 | 99.85  |
| ZK002-24.5-2  | SpI        | 0.00 | 0.00 | 32.79 | 0.00 | 0.00 | 0.00 | 5.99 | 0.21 | 0.00 | 0.02 | 60.03 | 99.03  |
| ZK002-24.5-3  | SpI        | 0.01 | 0.09 | 33.19 | 0.00 | 0.00 | 0.00 | 5.49 | 0.21 | 0.00 | 0.00 | 60.10 | 99.10  |
| ZK002-24.5-4  | SpI        | 0.04 | 0.00 | 33.10 | 0.00 | 0.00 | 0.00 | 5.57 | 0.28 | 0.03 | 0.00 | 60.02 | 99.03  |
| ZK002-109.5-1 | SpI        | 0.00 | 0.03 | 33.00 | 0.00 | 0.00 | 0.00 | 6.27 | 0.39 | 0.00 | 0.00 | 59.38 | 99.06  |
| ZK002-109.5-2 | SpI        | 0.00 | 0.00 | 33.55 | 0.00 | 0.00 | 0.00 | 6.55 | 0.41 | 0.00 | 0.01 | 59.20 | 99.72  |
| ZK002-109.5-3 | SpI        | 0.00 | 0.00 | 33.24 | 0.00 | 0.00 | 0.00 | 6.62 | 0.40 | 0.01 | 0.00 | 60.08 | 100.35 |
| ZK002-109.5-4 | SpI        | 0.00 | 0.00 | 33.15 | 0.00 | 0.00 | 0.00 | 6.31 | 0.37 | 0.00 | 0.02 | 59.86 | 99.71  |
| ZK004-23.4-1  | SpI        | 0.03 | 0.00 | 33.22 | 0.00 | 0.00 | 0.00 | 6.22 | 0.24 | 0.02 | 0.00 | 60.21 | 99.94  |
| ZK004-23.4-2  | SpI        | 0.00 | 0.01 | 32.76 | 0.00 | 0.00 | 0.00 | 5.74 | 0.25 | 0.01 | 0.01 | 60.67 | 99.45  |
| ZK004-23.4-3  | SpI        | 0.00 | 0.04 | 33.31 | 0.00 | 0.00 | 0.00 | 6.86 | 0.22 | 0.00 | 0.03 | 59.15 | 99.58  |
| ZK004-79.9-1  | SpI        | 0.00 | 0.00 | 32.80 | 0.00 | 0.00 | 0.00 | 4.31 | 0.28 | 0.00 | 0.47 | 61.94 | 99.79  |
| ZK004-79.9-2  | SpI        | 0.00 | 0.01 | 33.03 | 0.00 | 0.00 | 0.00 | 4.95 | 0.21 | 0.02 | 0.02 | 61.72 | 99.96  |
| ZK004-79.9-3  | SpI        | 0.03 | 0.02 | 33.17 | 0.00 | 0.00 | 0.00 | 6.00 | 0.28 | 0.01 | 3.00 | 57.04 | 99.55  |
| ZK004-79.9-4  | SpI        | 0.02 | 0.00 | 32.80 | 0.00 | 0.00 | 0.00 | 4.38 | 0.28 | 0.00 | 0.43 | 61.86 | 99.76  |
| ZK004-79.9-5  | SpI        | 0.00 | 0.00 | 33.26 | 0.00 | 0.00 | 0.00 | 5.64 | 0.24 | 0.03 | 1.95 | 58.19 | 99.31  |
| ZK005-202.3-1 | SpI        | 0.05 | 0.00 | 33.24 | 0.00 | 0.00 | 0.00 | 6.98 | 0.30 | 0.02 | 0.04 | 60.26 | 100.89 |
| ZK005-202.3-2 | SpI        | 0.02 | 0.00 | 33.41 | 0.00 | 0.00 | 0.00 | 6.01 | 0.25 | 0.02 | 1.35 | 59.18 | 100.24 |
| ZK005-202.3-3 | SpI        | 0.01 | 0.01 | 33.25 | 0.00 | 0.00 | 0.00 | 6.71 | 0.24 | 0.04 | 0.17 | 59.45 | 99.88  |
| ZK501-258.2-1 | SpI        | 0.02 | 0.03 | 33.45 | 0.00 | 0.00 | 0.00 | 5.87 | 0.23 | 0.01 | 1.74 | 59.31 | 100.66 |
| ZK501-258.2-2 | SpI        | 0.00 | 0.00 | 33.21 | 0.00 | 0.02 | 0.00 | 6.02 | 0.22 | 0.00 | 0.85 | 59.43 | 99.75  |
| ZK501-258.2-3 | SpI        | 0.01 | 0.02 | 33.05 | 0.00 | 0.00 | 0.00 | 5.28 | 0.31 | 0.02 | 0.24 | 60.67 | 99.60  |
| ZK504-108.6-1 | SpI        | 0.00 | 0.00 | 33.19 | 0.00 | 0.00 | 0.00 | 7.22 | 0.28 | 0.00 | 0.87 | 57.68 | 99.24  |
| ZK504-108.6-2 | SpI        | 0.00 | 0.02 | 32.77 | 0.00 | 0.00 | 0.00 | 4.73 | 0.27 | 0.00 | 0.00 | 63.15 | 100.94 |

|               |      |      |      |       |      |      |      |      |      |      |      |       |        |
|---------------|------|------|------|-------|------|------|------|------|------|------|------|-------|--------|
| ZK504-108.6-3 | SpI  | 0.00 | 0.01 | 33.18 | 0.00 | 0.00 | 0.00 | 4.86 | 0.26 | 0.00 | 0.02 | 61.54 | 99.87  |
| ZK505-374.5-1 | SpI  | 0.05 | 0.00 | 32.72 | 0.00 | 0.00 | 0.00 | 3.41 | 0.24 | 0.02 | 0.07 | 62.93 | 99.43  |
| ZK505-374.5-2 | SpI  | 0.02 | 0.02 | 33.13 | 0.00 | 0.00 | 0.00 | 4.62 | 0.26 | 0.00 | 0.04 | 61.66 | 99.75  |
| ZK505-374.5-3 | SpI  | 0.02 | 0.00 | 33.35 | 0.00 | 0.00 | 0.00 | 4.71 | 0.28 | 0.00 | 0.05 | 61.25 | 99.66  |
| Min           | SpI  | 0.00 | 0.00 | 32.72 | 0.00 | 0.00 | 0.00 | 3.41 | 0.21 | 0.00 | 0.00 | 57.04 | 99.03  |
| Max           | SpI  | 0.05 | 0.09 | 33.55 | 0.00 | 0.02 | 0.00 | 7.22 | 0.41 | 0.04 | 3.00 | 63.15 | 100.94 |
| Median        | SpI  | 0.01 | 0.00 | 33.19 | 0.00 | 0.00 | 0.00 | 5.90 | 0.26 | 0.00 | 0.04 | 60.09 | 99.73  |
| ZK001-131.7-1 | SpII | 0.07 | 0.00 | 33.47 | 0.00 | 0.00 | 0.00 | 6.04 | 0.17 | 0.01 | 0.08 | 59.85 | 99.69  |
| ZK001-131.7-2 | SpII | 0.04 | 0.01 | 33.51 | 0.00 | 0.00 | 0.00 | 4.75 | 0.14 | 0.01 | 0.02 | 60.86 | 99.34  |
| ZK001-131.7-3 | SpII | 0.00 | 0.01 | 33.49 | 0.00 | 0.00 | 0.00 | 5.21 | 0.06 | 0.01 | 0.03 | 60.93 | 99.74  |
| ZK002-66.2-1  | SpII | 0.05 | 0.00 | 32.95 | 0.00 | 0.00 | 0.00 | 6.24 | 0.00 | 0.07 | 0.00 | 60.42 | 99.72  |
| ZK002-66.2-2  | SpII | 0.00 | 0.03 | 33.17 | 0.00 | 0.00 | 0.00 | 7.36 | 0.07 | 0.03 | 0.07 | 58.62 | 99.35  |
| ZK002-86.2-1  | SpII | 0.00 | 0.00 | 33.54 | 0.00 | 0.00 | 0.00 | 6.95 | 0.17 | 0.02 | 0.16 | 59.26 | 100.10 |
| ZK002-86.2-2  | SpII | 0.05 | 0.08 | 33.18 | 0.00 | 0.00 | 0.00 | 7.38 | 0.14 | 0.04 | 0.06 | 58.25 | 99.17  |
| ZK002-86.2-3  | SpII | 0.00 | 0.00 | 33.25 | 0.00 | 0.00 | 0.00 | 7.98 | 0.14 | 0.07 | 0.18 | 58.18 | 99.79  |
| ZK002-86.2-4  | SpII | 0.02 | 0.00 | 33.47 | 0.00 | 0.00 | 0.00 | 7.54 | 0.09 | 0.00 | 0.10 | 59.24 | 100.46 |
| ZK002-86.2-5  | SpII | 0.03 | 0.01 | 33.51 | 0.00 | 0.00 | 0.00 | 7.18 | 0.12 | 0.01 | 0.07 | 59.85 | 100.78 |
| ZK004-90.5-1  | SpII | 0.00 | 0.00 | 33.15 | 0.00 | 0.00 | 0.00 | 5.52 | 0.15 | 0.01 | 0.00 | 60.84 | 99.67  |
| ZK004-90.5-2  | SpII | 0.01 | 0.02 | 32.89 | 0.00 | 0.00 | 0.00 | 6.13 | 0.12 | 0.01 | 0.01 | 60.02 | 99.21  |
| ZK004-90.5-3  | SpII | 0.00 | 0.00 | 33.21 | 0.00 | 0.00 | 0.00 | 5.71 | 0.14 | 0.00 | 0.05 | 61.02 | 100.13 |
| ZK004-90.5-4  | SpII | 0.00 | 0.00 | 33.27 | 0.00 | 0.00 | 0.00 | 5.34 | 0.09 | 0.00 | 0.07 | 60.52 | 99.29  |
| ZK504-132.7-1 | SpII | 0.00 | 0.00 | 33.22 | 0.00 | 0.00 | 0.00 | 4.77 | 0.11 | 0.00 | 0.20 | 61.37 | 99.67  |
| ZK504-132.7-2 | SpII | 0.01 | 0.00 | 32.83 | 0.00 | 0.00 | 0.00 | 4.70 | 0.15 | 0.00 | 0.11 | 62.12 | 99.91  |
| ZK504-132.7-3 | SpII | 0.05 | 0.05 | 33.18 | 0.00 | 0.00 | 0.00 | 4.67 | 0.15 | 0.01 | 0.24 | 61.35 | 99.69  |
| Min           | SpII | 0.00 | 0.00 | 32.83 | 0.00 | 0.00 | 0.00 | 4.67 | 0.00 | 0.00 | 0.00 | 58.18 | 99.17  |
| Max           | SpII | 0.07 | 0.08 | 33.54 | 0.00 | 0.00 | 0.00 | 7.98 | 0.17 | 0.07 | 0.24 | 62.12 | 100.78 |

|        |      |      |      |       |      |      |      |      |      |      |      |       |       |
|--------|------|------|------|-------|------|------|------|------|------|------|------|-------|-------|
| Median | SpII | 0.01 | 0.00 | 33.22 | 0.00 | 0.00 | 0.00 | 6.04 | 0.14 | 0.01 | 0.07 | 60.42 | 99.69 |
|--------|------|------|------|-------|------|------|------|------|------|------|------|-------|-------|

**Table S3** EPMA major element compositions for pyrite from the Pusangguo deposit (wt%).

| Sample        | Pyrite | As   | Se   | S     | Pb   | Bi   | Ag   | Fe    | Co   | Ni   | Cu   | Zn   | Total  |
|---------------|--------|------|------|-------|------|------|------|-------|------|------|------|------|--------|
| ZK504-132.7-1 | PyI    | 0.00 | 0.06 | 53.58 | 0.00 | 0.00 | 0.00 | 45.51 | 0.03 | 0.00 | 0.13 | 0.03 | 99.34  |
| ZK504-132.7-2 | PyI    | 0.18 | 0.01 | 53.16 | 0.00 | 0.00 | 0.00 | 46.19 | 0.06 | 0.00 | 0.01 | 0.00 | 99.61  |
| ZK504-132.7-3 | PyI    | 0.00 | 0.00 | 52.82 | 0.00 | 0.00 | 0.01 | 46.30 | 0.06 | 0.00 | 0.58 | 0.00 | 99.77  |
| ZK504-132.7-4 | PyI    | 0.00 | 0.04 | 53.85 | 0.00 | 0.00 | 0.01 | 46.09 | 0.04 | 0.01 | 0.01 | 0.00 | 100.05 |
| ZK004-90.5-1  | PyI    | 0.22 | 0.00 | 53.51 | 0.00 | 0.00 | 0.00 | 45.65 | 0.04 | 0.01 | 0.04 | 0.03 | 99.50  |
| ZK004-90.5-2  | PyI    | 0.00 | 0.00 | 53.00 | 0.00 | 0.00 | 0.01 | 45.87 | 0.05 | 0.00 | 0.15 | 0.15 | 99.23  |
| ZK004-90.5-3  | PyI    | 0.00 | 0.00 | 53.69 | 0.00 | 0.00 | 0.01 | 46.06 | 0.05 | 0.07 | 0.15 | 0.04 | 100.07 |
| ZK002-109.5-1 | PyI    | 0.03 | 0.00 | 52.93 | 0.00 | 0.00 | 0.00 | 46.46 | 0.07 | 0.01 | 0.02 | 0.00 | 99.52  |
| ZK002-109.5-2 | PyI    | 0.02 | 0.00 | 53.87 | 0.00 | 0.00 | 0.01 | 45.27 | 0.09 | 0.00 | 0.03 | 0.01 | 99.30  |
| ZK002-109.5-3 | PyI    | 0.00 | 0.01 | 53.52 | 0.00 | 0.00 | 0.00 | 46.50 | 0.05 | 0.00 | 0.05 | 0.00 | 100.13 |
| ZK002-109.5-4 | PyI    | 0.01 | 0.00 | 55.06 | 0.00 | 0.00 | 0.00 | 45.87 | 0.06 | 0.02 | 0.00 | 0.00 | 101.02 |
| ZK501-258.2-1 | PyI    | 0.03 | 0.02 | 53.41 | 0.00 | 0.00 | 0.01 | 46.19 | 0.06 | 0.04 | 0.00 | 0.00 | 99.76  |
| ZK501-258.2-2 | PyI    | 0.07 | 0.00 | 53.48 | 0.00 | 0.00 | 0.00 | 46.39 | 0.02 | 0.02 | 0.01 | 0.00 | 99.99  |
| ZK501-258.2-3 | PyI    | 0.01 | 0.03 | 54.17 | 0.00 | 0.00 | 0.03 | 45.57 | 0.06 | 0.00 | 0.00 | 0.00 | 99.87  |
| Min           | PyI    | 0.00 | 0.00 | 52.82 | 0.00 | 0.00 | 0.00 | 45.27 | 0.02 | 0.00 | 0.00 | 0.00 | 99.23  |
| Max           | PyI    | 0.22 | 0.06 | 55.06 | 0.00 | 0.00 | 0.03 | 46.50 | 0.09 | 0.07 | 0.58 | 0.15 | 101.02 |
| Median        | PyI    | 0.01 | 0.00 | 53.52 | 0.00 | 0.00 | 0.01 | 46.08 | 0.06 | 0.01 | 0.03 | 0.00 | 99.77  |
| ZK005-202.3-1 | PyII   | 0.32 | 0.02 | 54.45 | 0.00 | 0.00 | 0.00 | 46.47 | 0.11 | 0.00 | 0.00 | 0.08 | 101.45 |
| ZK005-202.3-2 | PyII   | 0.30 | 0.02 | 53.17 | 0.00 | 0.00 | 0.00 | 45.83 | 0.56 | 0.01 | 0.01 | 0.00 | 99.90  |
| ZK005-202.3-3 | PyII   | 0.27 | 0.03 | 54.63 | 0.00 | 0.00 | 0.00 | 46.38 | 0.28 | 0.02 | 0.00 | 0.02 | 101.63 |
| ZK002-66.2-1  | PyII   | 0.07 | 0.00 | 52.75 | 0.00 | 0.00 | 0.00 | 45.93 | 0.28 | 0.13 | 0.00 | 0.00 | 99.16  |
| ZK002-66.2-2  | PyII   | 0.07 | 0.00 | 53.97 | 0.00 | 0.00 | 0.03 | 45.65 | 0.17 | 0.00 | 0.00 | 0.00 | 99.89  |
| ZK002-66.2-3  | PyII   | 0.00 | 0.00 | 54.80 | 0.00 | 0.00 | 0.01 | 44.57 | 0.27 | 0.06 | 0.03 | 0.00 | 99.74  |
| ZK001-131.7-1 | PyII   | 0.02 | 0.00 | 53.72 | 0.00 | 0.00 | 0.01 | 45.54 | 0.22 | 0.00 | 0.00 | 0.00 | 99.51  |

|               |      |      |      |       |      |      |      |       |      |      |      |      |        |
|---------------|------|------|------|-------|------|------|------|-------|------|------|------|------|--------|
| ZK001-131.7-2 | PyII | 0.01 | 0.00 | 53.51 | 0.00 | 0.00 | 0.03 | 46.29 | 0.19 | 0.01 | 0.00 | 0.01 | 100.05 |
| ZK001-131.7-3 | PyII | 0.03 | 0.00 | 53.87 | 0.00 | 0.00 | 0.00 | 45.57 | 0.13 | 0.01 | 0.07 | 0.05 | 99.73  |
| ZK505-374.5-1 | PyII | 0.17 | 0.00 | 53.50 | 0.00 | 0.00 | 0.00 | 46.67 | 0.16 | 0.00 | 0.10 | 0.03 | 100.63 |
| ZK505-374.5-2 | PyII | 0.08 | 0.07 | 53.53 | 0.00 | 0.00 | 0.03 | 45.78 | 0.20 | 0.06 | 0.13 | 0.03 | 99.91  |
| ZK505-374.5-3 | PyII | 0.00 | 0.00 | 53.63 | 0.00 | 0.00 | 0.00 | 46.05 | 0.18 | 0.04 | 0.00 | 0.03 | 99.93  |
| Min           | PyII | 0.00 | 0.00 | 52.75 | 0.00 | 0.00 | 0.00 | 44.57 | 0.11 | 0.00 | 0.00 | 0.00 | 99.16  |
| Max           | PyII | 0.32 | 0.07 | 54.80 | 0.00 | 0.00 | 0.03 | 46.67 | 0.56 | 0.13 | 0.13 | 0.08 | 101.63 |
| Median        | PyII | 0.07 | 0.00 | 53.68 | 0.00 | 0.00 | 0.00 | 45.88 | 0.20 | 0.01 | 0.00 | 0.02 | 99.91  |

**Table S4** Summary of LA-ICP-MS trace elemental data (in ppm) obtained for sphalerite from the Pusangguo deposit.

| Analysis spot | Sphalerite | Ti   | V     | Cr    | Mn   | Fe    | Co   | Ni    | Cu    | Ga    | Ge    | As    | Se    | Ag    | Cd   | In    | Sn   | Sb    | Au    | Tl    | Pb    | Bi    |
|---------------|------------|------|-------|-------|------|-------|------|-------|-------|-------|-------|-------|-------|-------|------|-------|------|-------|-------|-------|-------|-------|
| ZK002-24.5-1  | SpI        | 1247 | 3.80  | 4.78  | 4252 | 88891 | 1695 | 4.82  | 1012  | 0.460 | 0.750 | 0.320 | 5.61  | 8.66  | 4587 | 17.0  | 4.18 | 0.228 | 0.034 | 0.054 | 9.36  | 4.29  |
| ZK002-24.5-2  | SpI        | 1559 | 0.376 | 4.68  | 3825 | 82357 | 1634 | 3.80  | 524   | 0.411 | 0.710 | 1.15  | 4.54  | 3.29  | 4557 | 12.2  | 4.28 | 0.092 | 0.020 | 0.019 | 9.54  | 4.67  |
| ZK002-24.5-3  | SpI        | 692  | b.d.l | b.d.l | 3934 | 81796 | 1568 | 3.72  | 1959  | 0.419 | 0.680 | 0.193 | 5.33  | 5.21  | 4502 | 14.1  | 4.05 | 0.143 | 0.100 | 0.009 | 10.5  | 12.3  |
| ZK002-24.5-4  | SpI        | 683  | b.d.l | 27.5  | 3172 | 81049 | 1215 | 5.69  | 48.0  | 0.820 | 0.670 | 5.12  | 4.40  | 2.35  | 4397 | 9.36  | 4.09 | 1.25  | 0.009 | 0.420 | 77.3  | 0.580 |
| ZK002-24.5-5  | SpI        | 708  | b.d.l | b.d.l | 3734 | 83141 | 1558 | 3.29  | 239   | 0.340 | 0.710 | 0.165 | 4.57  | 4.16  | 4651 | 15.4  | 3.76 | 0.055 | 0.023 | 0.008 | 25.9  | 3.70  |
| ZK002-24.5-6  | SpI        | 1503 | 0.041 | b.d.l | 3475 | 80420 | 1370 | 4.62  | 70.6  | 0.174 | 0.700 | 2.26  | 4.62  | 3.57  | 4512 | 8.27  | 3.75 | b.d.l | b.d.l | b.d.l | 1.58  | 1.47  |
| ZK002-24.5-7  | SpI        | 715  | 25.6  | 46.5  | 3965 | 83327 | 1667 | 3.15  | 2640  | 1.920 | 0.830 | 0.480 | 5.12  | 6.15  | 4361 | 18.8  | 5.35 | 1.25  | 0.106 | 0.189 | 17.0  | 14.0  |
| ZK505-374.5-1 | SpI        | 2.42 | 0.211 | 1.26  | 5068 | 57983 | 1518 | 2.52  | 5790  | 0.126 | 0.580 | 4.33  | 3.75  | 12.4  | 2454 | 4.20  | 3.14 | 1.84  | 0.073 | 0.134 | 1.38  | 1.16  |
| ZK505-374.5-2 | SpI        | 2.03 | 0.064 | 0.58  | 1853 | 51756 | 1482 | 2.44  | 597   | 0.272 | 0.420 | 2.79  | 2.92  | 2.39  | 2711 | 2.08  | 2.93 | 0.840 | 0.012 | 0.015 | 2.10  | 1.89  |
| ZK505-374.5-3 | SpI        | 1.98 | b.d.l | 0.790 | 1442 | 44844 | 1506 | 7.64  | 4506  | 0.092 | 0.450 | 0.215 | 2.77  | 7.98  | 2677 | 2.09  | 2.59 | 0.019 | 0.006 | b.d.l | 1.24  | 0.554 |
| ZK505-374.5-4 | SpI        | 2.40 | 0.076 | b.d.l | 4354 | 53622 | 1594 | 3.38  | 1400  | 0.119 | 0.410 | 0.277 | 2.77  | 3.30  | 2524 | 3.40  | 2.59 | 0.094 | 0.010 | 0.012 | 2.51  | 0.470 |
| ZK505-374.5-5 | SpI        | 1.75 | b.d.l | 0.800 | 1742 | 35839 | 1027 | 2.90  | 10.6  | 0.420 | 0.440 | 0.123 | 2.87  | 0.971 | 2430 | 0.195 | 2.26 | 0.239 | 0.003 | 0.006 | 2.96  | 0.213 |
| ZK505-374.5-6 | SpI        | 2.08 | b.d.l | 0.770 | 1584 | 33483 | 928  | 2.88  | 7.35  | 0.261 | 0.390 | b.d.l | 2.91  | 0.959 | 2403 | 0.103 | 2.95 | b.d.l | b.d.l | b.d.l | 0.140 | 0.013 |
| ZK005-202.3-1 | SpI        | 3730 | 563   | 118   | 1878 | 59624 | 3038 | 28.7  | 1907  | 15.6  | 71.2  | 31.0  | b.d.l | 11.2  | 2349 | 6.08  | 103  | 146   | b.d.l | 0.617 | 8.65  | b.d.l |
| ZK005-202.3-2 | SpI        | 103  | 0.925 | 0.960 | 2626 | 45961 | 1930 | 1.98  | 21804 | 0.609 | 0.440 | 0.191 | 3.08  | 15.8  | 2810 | 2.34  | 5.20 | 0.405 | 0.016 | 0.008 | 8.49  | 0.003 |
| ZK005-202.3-3 | SpI        | 2.10 | 0.011 | 0.560 | 2531 | 43715 | 2046 | 1.21  | 19970 | 0.379 | b.d.l | 0.117 | 2.51  | 13.1  | 2820 | 2.69  | 4.87 | 0.575 | 0.035 | 0.013 | 11.5  | 0.005 |
| ZK005-202.3-4 | SpI        | 2.63 | 0.280 | b.d.l | 2694 | 31656 | 1973 | 1.11  | 6478  | 0.102 | 0.400 | 0.183 | 2.72  | 18.5  | 2687 | 2.96  | 4.20 | 2.33  | 0.030 | 0.038 | 9.67  | 0.195 |
| ZK005-202.3-5 | SpI        | 3431 | 7.28  | 2.63  | 2795 | 44258 | 2103 | 2.04  | 18782 | 0.380 | 0.420 | 0.522 | 2.99  | 19.2  | 2691 | 2.64  | 4.13 | 1.38  | 0.031 | 0.017 | 11.2  | 0.017 |
| ZK501-258.2-1 | SpI        | 93.9 | 0.147 | 0.660 | 2292 | 41365 | 1934 | 1.04  | 20476 | 0.197 | 0.430 | 0.203 | 2.89  | 14.9  | 2803 | 2.54  | 5.61 | 0.910 | 0.083 | 0.019 | 18.1  | 0.005 |
| ZK501-258.2-2 | SpI        | 13.1 | 2.19  | 1.05  | 5315 | 43792 | 2051 | 0.940 | 10434 | 0.244 | 0.450 | 0.360 | 25.3  | 61.1  | 2744 | 2.83  | 7.23 | 19.4  | 0.165 | 0.270 | 25.0  | 1.87  |
| ZK501-258.2-3 | SpI        | 370  | 1.97  | 1.22  | 4396 | 47888 | 1937 | 1.90  | 17317 | 0.498 | 0.460 | 0.347 | 3.25  | 16.4  | 2671 | 2.55  | 5.46 | 0.414 | 0.014 | 0.027 | 11.6  | 0.016 |
| ZK501-258.2-4 | SpI        | 2.13 | 0.032 | 0.560 | 1832 | 44696 | 1295 | 6.23  | 1591  | 0.157 | 0.370 | b.d.l | 2.78  | 3.14  | 2498 | 0.251 | 2.92 | 0.024 | b.d.l | b.d.l | 0.695 | 0.128 |
| ZK504-108.6-1 | SpI        | 1.91 | 0.009 | 0.72  | 1530 | 49199 | 1344 | 9.77  | 7521  | 0.447 | 0.330 | 0.214 | b.d.l | 3.32  | 2747 | 0.498 | 6.10 | 0.049 | 0.006 | 0.043 | 5.56  | 3.45  |
| ZK504-108.6-2 | SpI        | 1.85 | b.d.l | b.d.l | 1946 | 48594 | 1497 | 1.33  | 1091  | 0.058 | 0.440 | 0.135 | 3.38  | 2.45  | 2552 | 4.19  | 5.36 | 0.085 | 0.363 | 0.032 | 3.19  | 2.38  |



|               |      |      |       |       |      |       |      |      |       |       |       |       |       |       |      |       |      |       |       |       |       |       |
|---------------|------|------|-------|-------|------|-------|------|------|-------|-------|-------|-------|-------|-------|------|-------|------|-------|-------|-------|-------|-------|
| ZK504-108.6-3 | SpI  | 2.29 | b.d.l | b.d.l | 1749 | 48905 | 1577 | 4.72 | 3853  | 0.258 | 0.410 | 0.163 | 217   | 1806  | 2792 | 2.67  | 6.47 | 0.676 | 0.025 | 15.4  | 2.82  | 1.97  |
| ZK504-108.6-4 | SpI  | 2.09 | b.d.l | b.d.l | 1943 | 45798 | 1525 | 1.33 | 312   | 0.168 | 0.380 | b.d.l | 2.8   | 1.37  | 2576 | 5.99  | 4.59 | 0.013 | 0.014 | 0.006 | 5.67  | 2.28  |
| ZK504-108.6-5 | SpI  | 2.18 | b.d.l | b.d.l | 1735 | 53191 | 1493 | 8.59 | 7118  | 0.178 | b.d.l | 0.110 | 2.13  | 14.7  | 2741 | 1.48  | 4.59 | 0.040 | 0.007 | 0.007 | 5.72  | 2.46  |
| ZK004-23.4-1  | SpI  | 3.42 | 0.184 | 0.930 | 2307 | 51804 | 1441 | 1.50 | 3402  | 0.446 | 0.590 | 0.232 | 2.94  | 4.89  | 2672 | 2.24  | 4.30 | 0.173 | 0.038 | 0.028 | 6.32  | 8.81  |
| ZK004-23.4-2  | SpI  | 2.18 | b.d.l | b.d.l | 1638 | 37565 | 1169 | 4.13 | 90.6  | 0.489 | 0.570 | 0.137 | 2.80  | 1.18  | 2549 | 0.098 | 3.74 | 0.049 | b.d.l | 0.017 | 0.570 | 0.059 |
| ZK004-23.4-3  | SpI  | 2.59 | 0.138 | 0.580 | 4160 | 56696 | 1566 | 2.08 | 1296  | 0.409 | 0.480 | b.d.l | 2.89  | 2.11  | 2554 | 1.28  | 3.88 | 0.106 | b.d.l | 0.005 | 3.05  | 1.29  |
| ZK004-23.4-4  | SpI  | 1.80 | b.d.l | 0.580 | 1684 | 42870 | 1275 | 2.64 | 279   | 0.279 | 0.450 | b.d.l | 3.03  | 1.61  | 2520 | 0.328 | 3.61 | 0.018 | b.d.l | b.d.l | 0.491 | 0.219 |
| ZK004-23.4-5  | SpI  | 1.88 | b.d.l | b.d.l | 1436 | 35268 | 1149 | 2.29 | 7.58  | 0.262 | b.d.l | 0.102 | b.d.l | 0.987 | 2392 | 0.122 | 3.24 | b.d.l | b.d.l | b.d.l | 0.135 | 0.090 |
| ZK004-23.4-6  | SpI  | 1.76 | b.d.l | 0.570 | 1734 | 45041 | 1148 | 6.64 | 2345  | 0.317 | 0.330 | b.d.l | 2.91  | 4.24  | 2570 | 0.504 | 3.08 | b.d.l | 0.004 | 0.002 | 4.93  | 0.711 |
| ZK004-79.9-1  | SpI  | 2.21 | b.d.l | b.d.l | 2308 | 32536 | 1985 | 1.13 | 7302  | 0.072 | 0.410 | 0.192 | 2.92  | 13.4  | 2795 | 3.08  | 7.33 | 0.790 | 0.044 | 0.009 | 2.45  | 0.060 |
| ZK004-79.9-2  | SpI  | 1808 | 4.97  | 0.820 | 2669 | 34631 | 1920 | 3.91 | 11380 | 0.568 | 4.350 | 7.71  | 28.6  | 41.4  | 2701 | 3.03  | 8.71 | 8.87  | 0.017 | 0.142 | 1.27  | 3.11  |
| ZK004-79.9-3  | SpI  | 2.40 | b.d.l | 0.590 | 2425 | 41236 | 1973 | 1.85 | 15875 | 0.333 | 0.440 | 0.165 | 3.03  | 21.0  | 2875 | 1.92  | 7.04 | 0.088 | 0.014 | b.d.l | 3.81  | 0.003 |
| ZK004-79.9-4  | SpI  | 2.23 | b.d.l | 0.720 | 2422 | 35128 | 2006 | 1.09 | 9287  | 0.105 | 0.400 | 0.145 | 2.82  | 12.2  | 2817 | 2.95  | 6.21 | 0.300 | 0.072 | 0.009 | 9.43  | 0.011 |
| ZK004-79.9-5  | SpI  | 164  | 0.75  | 11.6  | 3304 | 35615 | 2017 | 1.24 | 8428  | 0.169 | 0.410 | 0.209 | 2.75  | 17.8  | 2731 | 2.99  | 5.65 | 0.473 | 0.064 | 0.037 | 9.71  | 0.018 |
| ZK002-109.5-1 | SpI  | 923  | 0.019 | b.d.l | 3508 | 84634 | 1572 | 4.39 | 163   | 0.490 | 0.670 | b.d.l | 4.36  | 2.96  | 4540 | 6.71  | 3.51 | b.d.l | 0.024 | b.d.l | 4.36  | 3.17  |
| ZK002-109.5-2 | SpI  | 558  | 0.023 | b.d.l | 3399 | 78581 | 1416 | 3.96 | 88.5  | 0.550 | 0.720 | b.d.l | 4.55  | 2.60  | 4331 | 12.5  | 3.38 | 0.053 | 0.015 | 0.008 | 3.58  | 1.85  |
| ZK002-109.5-3 | SpI  | 760  | 0.163 | b.d.l | 3217 | 76605 | 1102 | 5.49 | 68.0  | 1.00  | 0.680 | 0.510 | 6.33  | 2.45  | 4279 | 42.7  | 3.19 | 0.352 | b.d.l | 0.021 | 2.32  | 1.36  |
| ZK002-109.5-4 | SpI  | 753  | b.d.l | b.d.l | 3638 | 82471 | 1569 | 3.14 | 2048  | 0.670 | 0.730 | b.d.l | 4.57  | 6.99  | 4471 | 15.1  | 3.09 | 0.217 | 0.081 | 0.004 | 11.0  | 10.4  |
| ZK002-109.5-5 | SpI  | 671  | b.d.l | b.d.l | 3956 | 83497 | 1682 | 4.08 | 220   | 0.440 | 0.700 | 0.210 | b.d.l | 2.97  | 4572 | 9.16  | 3.26 | b.d.l | 0.013 | b.d.l | 2.83  | 2.15  |
| ZK002-109.5-6 | SpI  | 2233 | 0.510 | 1.52  | 3061 | 77977 | 1181 | 4.69 | 92.1  | 0.970 | 0.790 | 0.224 | 4.52  | 3.73  | 4359 | 18.1  | 3.11 | 0.141 | 0.027 | 0.029 | 7.29  | 3.61  |
| ZK001-131.7-1 | SpII | 1.99 | b.d.l | 1.59  | 3821 | 52665 | 80.1 | 4.75 | 1931  | 0.753 | 0.300 | 0.190 | b.d.l | 3.82  | 2800 | 10.7  | 16.9 | 0.057 | 0.048 | 0.009 | 125   | 12.6  |
| ZK001-131.7-2 | SpII | 2.19 | 0.020 | 2.33  | 3645 | 53764 | 130  | 5.83 | 3899  | 0.823 | 0.470 | 0.151 | 3.43  | 5.84  | 2686 | 9.58  | 14.2 | 0.058 | 0.041 | 0.029 | 189   | 12.1  |
| ZK001-131.7-3 | SpII | 1.94 | b.d.l | 1.27  | 3678 | 50392 | 109  | 2.87 | 47.5  | 0.603 | 0.420 | b.d.l | 2.56  | 1.45  | 2675 | 13.6  | 13.3 | 0.030 | 0.017 | 0.003 | 2.77  | 4.34  |
| ZK001-131.7-4 | SpII | 2.20 | b.d.l | 1.98  | 3521 | 49831 | 169  | 1.68 | 26.5  | 0.525 | 0.450 | 0.140 | 3.06  | 2.11  | 2776 | 10.1  | 12.3 | b.d.l | 0.029 | 0.006 | 8.79  | 4.11  |
| ZK001-131.7-5 | SpII | 2.34 | b.d.l | 0.640 | 3558 | 53500 | 136  | 4.85 | 2089  | 0.800 | 0.440 | b.d.l | 2.74  | 3.27  | 2769 | 13.0  | 12.5 | 0.034 | 0.011 | 0.004 | 2.85  | 1.91  |
| ZK001-131.7-6 | SpII | 2.18 | b.d.l | 0.920 | 2912 | 54590 | 362  | 2.62 | 215   | 0.868 | 0.420 | b.d.l | 2.74  | 1.68  | 2908 | 9.47  | 12.0 | b.d.l | 0.006 | b.d.l | 2.44  | 1.63  |

|               |      |      |       |       |      |       |     |      |       |       |       |       |      |       |      |       |      |       |       |       |       |       |
|---------------|------|------|-------|-------|------|-------|-----|------|-------|-------|-------|-------|------|-------|------|-------|------|-------|-------|-------|-------|-------|
| ZK002-66.2-1  | SpII | 634  | b.d.l | 1.69  | 3318 | 71970 | 739 | 4.15 | 35.0  | 0.730 | 0.870 | 0.153 | 4.31 | 2.39  | 4270 | 8.38  | 4.30 | b.d.l | 0.013 | 0.004 | 2.06  | 1.78  |
| ZK002-66.2-2  | SpII | 684  | 0.550 | 1.83  | 4185 | 72697 | 608 | 4.67 | 59.5  | 0.440 | 0.730 | 0.660 | 4.35 | 2.09  | 4327 | 21.2  | 4.08 | 0.408 | 0.042 | 0.021 | 2.19  | 0.98  |
| ZK002-66.2-3  | SpII | 640  | 0.116 | 2.42  | 3193 | 68515 | 761 | 4.92 | 20.5  | 0.570 | 0.670 | 0.490 | 4.43 | 2.31  | 4268 | 12.2  | 3.53 | 0.109 | b.d.l | 0.011 | 1.71  | 1.19  |
| ZK002-66.2-4  | SpII | 645  | b.d.l | 1.59  | 3999 | 71836 | 540 | 1.68 | 88.4  | 0.580 | 0.740 | b.d.l | 4.36 | 4.45  | 4463 | 18.5  | 3.32 | 0.082 | 0.051 | 0.005 | 67.4  | 10.0  |
| ZK002-66.2-5  | SpII | 633  | 0.079 | b.d.l | 4171 | 77489 | 443 | 6.46 | 462   | 0.960 | 0.650 | 0.203 | 4.27 | 2.78  | 4733 | 18.5  | 3.55 | 0.164 | 0.029 | b.d.l | 2.74  | 1.59  |
| ZK002-66.2-6  | SpII | 614  | 0.048 | 6.22  | 3346 | 61181 | 269 | 1.85 | 91.3  | 0.870 | 0.620 | 0.148 | 4.01 | 7.04  | 4164 | 10.5  | 3.11 | 0.141 | 0.101 | 0.006 | 17.7  | 13.2  |
| ZK002-66.2-7  | SpII | 630  | 0.019 | 1.71  | 6397 | 80661 | 159 | 6.37 | 1508  | 1.84  | 0.720 | b.d.l | 4.65 | 4.76  | 4978 | 18.6  | 2.89 | 0.073 | 0.044 | b.d.l | 5.23  | 9.47  |
| ZK002-66.2-8  | SpII | 600  | 0.020 | b.d.l | 6231 | 81548 | 168 | 11.4 | 5912  | 1.54  | 0.750 | 0.205 | 4.72 | 5.66  | 4831 | 21.0  | 3.12 | b.d.l | 0.022 | b.d.l | 6.33  | 7.17  |
| ZK002-66.2-9  | SpII | 655  | b.d.l | 1.91  | 6336 | 77708 | 149 | 6.87 | 1967  | 1.24  | 0.750 | b.d.l | 4.76 | 4.18  | 5001 | 36.2  | 3.09 | 0.074 | 0.018 | b.d.l | 1.85  | 1.83  |
| ZK002-66.2-10 | SpII | 618  | 0.095 | b.d.l | 6443 | 78935 | 144 | 7.31 | 2400  | 1.61  | 0.930 | 0.340 | 4.82 | 3.78  | 5020 | 27.0  | 3.23 | b.d.l | 0.019 | b.d.l | 3.82  | 3.08  |
| ZK002-66.2-11 | SpII | 5837 | 1.38  | 8.43  | 4454 | 80503 | 949 | 3.15 | 270   | 0.750 | 0.740 | 0.600 | 4.90 | 3.57  | 4338 | 18.7  | 2.90 | 0.47  | 0.051 | 0.023 | 5.54  | 5.35  |
| ZK002-86.2-1  | SpII | 2.25 | b.d.l | 3.07  | 2735 | 54916 | 429 | 2.33 | 20.2  | 0.805 | 0.410 | 0.223 | 2.80 | 1.59  | 2720 | 10.6  | 11.3 | 0.013 | 0.005 | 0.009 | 4.34  | 1.67  |
| ZK002-86.2-2  | SpII | 2.23 | b.d.l | 1.28  | 2110 | 54300 | 615 | 3.42 | 635   | 0.600 | 0.410 | b.d.l | 2.78 | 2.40  | 2621 | 8.81  | 10.2 | 0.020 | b.d.l | 0.006 | 35.8  | 13.7  |
| ZK002-86.2-3  | SpII | 14.1 | 0.248 | 1.15  | 2114 | 52555 | 653 | 2.50 | 21.0  | 0.585 | 0.380 | 0.137 | 2.63 | 1.47  | 2665 | 7.79  | 9.47 | 0.042 | 0.010 | 0.010 | 3.50  | 1.41  |
| ZK002-86.2-4  | SpII | 2.27 | b.d.l | 2.91  | 2091 | 53572 | 721 | 2.90 | 24.0  | 0.252 | 0.350 | 0.123 | 2.71 | 1.63  | 2615 | 5.58  | 8.84 | 0.019 | 0.012 | 0.003 | 3.67  | 1.34  |
| ZK002-86.2-5  | SpII | 2.08 | b.d.l | 2.83  | 1882 | 52546 | 694 | 1.96 | 50.0  | 0.199 | b.d.l | 0.273 | 2.56 | 1.74  | 2459 | 8.64  | 8.32 | 0.016 | 0.018 | 0.015 | 3.26  | 1.28  |
| ZK002-86.2-6  | SpII | 95.7 | 7.04  | 37.5  | 2351 | 54317 | 730 | 1.92 | 639   | 0.395 | 0.480 | 0.890 | 3.35 | 5.03  | 2608 | 9.70  | 7.10 | 0.260 | 0.024 | 0.041 | 127   | 12.9  |
| ZK002-86.2-7  | SpII | 2.04 | 0.009 | 3.46  | 2045 | 51128 | 724 | 2.37 | 510   | 0.132 | 0.400 | 0.125 | 4.94 | 3.01  | 2527 | 7.37  | 7.50 | 0.065 | 0.053 | 0.007 | 9.23  | 6.21  |
| ZK002-86.2-8  | SpII | 2.24 | 0.039 | 2.66  | 2337 | 54822 | 834 | 2.77 | 73.7  | 0.123 | 0.410 | 0.125 | 3.20 | 1.48  | 2678 | 11.7  | 7.18 | b.d.l | 0.008 | 0.009 | 12.5  | 1.28  |
| ZK002-86.2-9  | SpII | 1.86 | b.d.l | 4.66  | 2401 | 51313 | 829 | 2.56 | 3739  | 0.103 | 0.390 | 0.164 | 3.20 | 8.44  | 2673 | 9.22  | 6.88 | 0.244 | 0.105 | 0.018 | 89.4  | 16.5  |
| ZK002-86.2-10 | SpII | 2.14 | b.d.l | 1.65  | 2269 | 55828 | 838 | 2.99 | 412   | 0.165 | 0.370 | b.d.l | 2.71 | 2.60  | 2677 | 8.94  | 7.33 | 0.028 | 0.012 | 0.026 | 5.20  | 1.84  |
| ZK004-90.5-1  | SpII | 1.99 | b.d.l | b.d.l | 1677 | 34260 | 886 | 3.20 | 9.28  | 0.320 | 0.430 | 0.211 | 2.72 | 0.997 | 2414 | 0.187 | 2.49 | b.d.l | 0.003 | b.d.l | 0.226 | 0.021 |
| ZK004-90.5-2  | SpII | 2.11 | b.d.l | 0.560 | 1670 | 34058 | 931 | 2.90 | 9.57  | 0.513 | 0.380 | 0.192 | 2.72 | 0.890 | 2375 | 0.251 | 2.55 | b.d.l | 0.005 | 0.004 | 0.665 | 0.193 |
| ZK004-90.5-3  | SpII | 1.57 | 0.006 | b.d.l | 1856 | 32571 | 705 | 2.31 | 9.25  | 0.502 | b.d.l | 0.113 | 1.89 | 0.999 | 2334 | 0.195 | 2.30 | 0.017 | b.d.l | b.d.l | 1.61  | 0.644 |
| ZK004-90.5-4  | SpII | 1.82 | b.d.l | 0.530 | 1642 | 32909 | 876 | 2.87 | 7.58  | 0.217 | 0.360 | b.d.l | 2.74 | 0.904 | 2374 | 0.080 | 2.22 | b.d.l | b.d.l | 0.003 | 0.526 | 0.036 |
| ZK504-132.7-1 | SpII | 1.97 | b.d.l | 0.87  | 1456 | 53258 | 886 | 25.8 | 29286 | 0.483 | 0.450 | 0.176 | 34.1 | 7.31  | 3056 | 46.3  | 17.4 | 0.058 | 0.021 | 0.019 | 115   | 16.9  |

|               |      |      |       |       |      |       |     |      |       |       |       |       |      |      |      |      |      |       |       |       |      |       |
|---------------|------|------|-------|-------|------|-------|-----|------|-------|-------|-------|-------|------|------|------|------|------|-------|-------|-------|------|-------|
| ZK504-132.7-2 | SpII | 2.46 | 0.169 | 0.63  | 1407 | 56490 | 843 | 24.9 | 33121 | 0.455 | 0.380 | 0.755 | 36.3 | 10.1 | 2960 | 47.8 | 15.9 | 0.093 | 0.036 | 0.040 | 379  | 258   |
| ZK504-132.7-3 | SpII | 2.27 | b.d.l | 1.42  | 1342 | 57277 | 756 | 87.4 | 27833 | 0.381 | 0.320 | b.d.l | 34.0 | 15.7 | 2884 | 39.6 | 14.0 | 0.245 | 0.069 | 0.012 | 1.09 | 0.702 |
| ZK504-132.7-4 | SpII | 2.06 | b.d.l | 0.65  | 1362 | 46826 | 784 | 67.8 | 20054 | 0.338 | 0.440 | 0.238 | 33.8 | 9.14 | 2812 | 36.8 | 12.3 | 0.066 | 0.235 | 0.013 | 3.12 | 6.40  |
| ZK504-132.7-5 | SpII | 116  | 1.83  | 1.18  | 1324 | 58089 | 820 | 35.1 | 30411 | 0.518 | 0.350 | 0.200 | 34.8 | 4.3  | 2896 | 47.0 | 12.4 | 0.058 | 0.027 | 0.030 | 12.1 | 7.39  |
| ZK504-132.7-6 | SpII | 2.18 | b.d.l | b.d.l | 1317 | 47612 | 766 | 73.0 | 18005 | 0.379 | 0.390 | 0.110 | 33.2 | 9.91 | 2841 | 37.6 | 10.8 | 0.052 | 0.056 | 0.008 | 5.22 | 6.36  |
| ZK504-132.7-7 | SpII | 16.9 | 0.759 | 0.92  | 1403 | 42136 | 802 | 42.4 | 15951 | 0.475 | 0.310 | 0.538 | 33.2 | 6.32 | 2860 | 39.7 | 9.92 | 0.066 | 0.064 | 0.007 | 75.2 | 11.6  |
| ZK504-132.7-8 | SpII | 2.43 | b.d.l | b.d.l | 1507 | 38895 | 817 | 42.1 | 10172 | 0.280 | 0.420 | b.d.l | 36.1 | 6.10 | 2889 | 36.3 | 9.18 | 0.055 | 0.032 | 0.017 | 107  | 17.0  |

The abbreviations "b.d.l" stands for "below detection limit".

**Table S5** Summary of LA-ICP-MS trace elemental data (in ppm) obtained for pyrite from the Pusangguo deposit.

| Analysis spot | Pyrite | Ti   | V     | Cr    | Mn    | Co    | Ni    | Cu    | Zn    | Ga    | Ge    | As   | Se    | Ag    | Cd    | In    | Sn    | Sb    | Au    | Tl    | Pb    | Bi    |
|---------------|--------|------|-------|-------|-------|-------|-------|-------|-------|-------|-------|------|-------|-------|-------|-------|-------|-------|-------|-------|-------|-------|
| ZK501-258.2-1 | PyI    | 2623 | 47.2  | 7.46  | 24.7  | 0.590 | 0.850 | 1.20  | 4.51  | 26.6  | 8.54  | 253  | 22.0  | 0.982 | 0.44  | 2.06  | 1.32  | 0.870 | 0.148 | 0.018 | 1.37  | b.d.l |
| ZK501-258.2-2 | PyI    | 1663 | 45.3  | 8.37  | 15.2  | 0.570 | 0.650 | 0.900 | 4.58  | 31.0  | 9.97  | 258  | 20.6  | 1.16  | 0.59  | 1.53  | 0.640 | 3.51  | 0.139 | b.d.l | 1.23  | b.d.l |
| ZK501-258.2-3 | PyI    | 598  | 30.7  | 3.41  | 12.7  | 0.880 | 0.860 | 0.750 | 10.8  | 21.5  | 18.6  | 568  | b.d.l | 2.14  | 0.479 | 7.12  | 0.500 | 1.49  | 0.197 | b.d.l | 1.31  | 0.152 |
| ZK501-258.2-4 | PyI    | 1353 | 47.3  | b.d.l | 12.6  | 0.590 | 0.920 | 0.870 | 3.85  | 28.7  | 13.2  | 233  | 22.2  | 1.20  | 0.770 | 1.92  | 0.360 | 0.590 | 0.039 | 0.026 | 0.919 | b.d.l |
| ZK501-258.2-5 | PyI    | 454  | 12.9  | b.d.l | 9.56  | 0.400 | 0.530 | 0.560 | 35.01 | 15.6  | 11.4  | 1968 | b.d.l | 0.114 | 0.959 | 4.79  | 0.510 | 0.302 | 0.431 | 0.015 | 17.0  | 0.074 |
| ZK501-258.2-6 | PyI    | 8874 | 129   | 53.4  | 9.03  | 0.980 | 0.930 | 1.06  | 10.8  | 30.4  | 22.3  | 75.7 | 25.3  | 2.22  | 0.670 | 1.55  | b.d.l | 0.279 | 0.047 | 0.069 | 1.48  | b.d.l |
| ZK002-109.5-1 | PyI    | 1100 | 43.2  | b.d.l | 188   | 0.620 | 0.600 | 0.710 | 4.29  | 24.3  | 15.2  | 477  | 16.7  | 0.189 | 0.532 | 2.26  | b.d.l | 0.275 | 2.03  | b.d.l | 26.1  | 0.491 |
| ZK002-109.5-2 | PyI    | 1684 | 48.5  | 6.56  | 6.58  | 1.560 | 0.740 | 0.820 | 62.9  | 31.3  | 16.6  | 2156 | 20.4  | 1.16  | 0.680 | 4.46  | 0.370 | 0.197 | 0.229 | 0.029 | 3.15  | b.d.l |
| ZK002-109.5-3 | PyI    | 1240 | 44.8  | b.d.l | 11.5  | 0.510 | 0.680 | 0.830 | 4.54  | 31.5  | 9.43  | 271  | 18.6  | 2.14  | 0.461 | 1.62  | 0.350 | 0.412 | 1.22  | b.d.l | 1.20  | 0.040 |
| ZK002-109.5-4 | PyI    | 2878 | 84.4  | 8.21  | 5.05  | 1.370 | 1.38  | 0.820 | 45.8  | 27.3  | 14.2  | 226  | 19.0  | 3.16  | 0.529 | 1.89  | b.d.l | 0.530 | 0.022 | b.d.l | 1.56  | 0.242 |
| ZK002-109.5-5 | PyI    | 2078 | 64.3  | 8.27  | 6.75  | 0.620 | 0.820 | 0.880 | 7.23  | 29.3  | 15.7  | 1417 | b.d.l | 3.18  | 0.606 | 3.41  | 2.30  | 1.34  | 1.03  | b.d.l | 2.20  | 0.034 |
| ZK002-109.5-6 | PyI    | 97.4 | 0.019 | 0.72  | 3.47  | 278   | 1.38  | 12.8  | 85.2  | 0.099 | b.d.l | 4565 | 12.6  | 2.36  | 0.365 | 0.007 | 0.30  | 0.880 | 1.02  | 0.017 | 268   | 19.6  |
| ZK504-132.7-1 | PyI    | 6597 | 180   | 6513  | 4.61  | 1.03  | 0.690 | 11.8  | 86.8  | 26.1  | 19.2  | 186  | 20.1  | 0.296 | 0.740 | 1.70  | b.d.l | 0.165 | 3.03  | b.d.l | 16    | 1.18  |
| ZK504-132.7-2 | PyI    | 1072 | 35.1  | 16.8  | 4.90  | 0.730 | 0.910 | 0.720 | 33.3  | 29.2  | 16.3  | 2377 | 18.2  | 2.15  | 0.725 | 5.16  | b.d.l | 0.940 | 4.03  | 0.016 | 2.01  | 0.028 |
| ZK504-132.7-3 | PyI    | 3018 | 71.0  | 39.3  | b.d.l | 0.690 | 0.970 | 0.930 | 17.5  | 31.0  | 9.44  | 288  | b.d.l | 3.18  | 0.430 | 1.33  | b.d.l | 1.04  | 2.03  | 0.058 | 0.988 | 0.026 |
| ZK504-132.7-4 | PyI    | 1404 | 46.5  | 20.5  | 3.00  | 1.38  | 0.720 | 0.810 | 45.7  | 26.5  | 18.6  | 1403 | b.d.l | 3.15  | 0.587 | 5.22  | b.d.l | 0.790 | 3.22  | 0.022 | 26.3  | 0.033 |
| ZK504-132.7-5 | PyI    | 116  | b.d.l | b.d.l | 16.8  | 3.18  | 0.940 | 0.910 | 14.1  | 30.2  | 32.8  | 176  | 42.3  | 3.68  | 332   | 20.6  | 0.270 | 0.700 | 1.84  | 14.9  | 26.6  | 7.84  |
| ZK504-132.7-6 | PyI    | 5569 | 69.2  | 27.9  | 9.45  | 0.71  | 0.900 | 1.01  | 16.5  | 28.2  | 14.7  | 146  | 24.4  | 1.67  | 0.810 | 1.63  | b.d.l | 1.38  | 1.03  | b.d.l | 41.3  | 19.6  |
| ZK004-90.5-1  | PyI    | 457  | 33.4  | 7.43  | 2.61  | 0.500 | 0.680 | 0.700 | 20.5  | 24.0  | 21.9  | 360  | b.d.l | 0.877 | 0.495 | 6.38  | b.d.l | 0.466 | 2.03  | b.d.l | 9.71  | 5.91  |
| ZK004-90.5-2  | PyI    | 2001 | 45.6  | 7.81  | 11.0  | 0.590 | 0.870 | 0.850 | 8.22  | 28.3  | 10.5  | 308  | 20.7  | 1.17  | 0.583 | 1.77  | 0.740 | 1.24  | 1.13  | b.d.l | 1.07  | 0.234 |
| ZK004-90.5-3  | PyI    | 5126 | 61.4  | 15.7  | 4.09  | 0.650 | 0.780 | 0.880 | 5.19  | 31.4  | 15.1  | 784  | 22.8  | 0.974 | 0.550 | 2.46  | b.d.l | 0.910 | 3.44  | 0.016 | 1.44  | b.d.l |
| ZK004-90.5-4  | PyI    | 3463 | 63.9  | 7.89  | 3.54  | 0.650 | 0.800 | 0.850 | 9.43  | 27.2  | 15.3  | 215  | b.d.l | 1.19  | 0.600 | 1.87  | b.d.l | 11.2  | 2.27  | b.d.l | 14.2  | b.d.l |
| ZK004-90.5-5  | PyI    | 3059 | 114   | 10.8  | 30.2  | 0.650 | 0.800 | 0.910 | 13.0  | 26.7  | 14.9  | 186  | 22.4  | 0.378 | 0.590 | 1.62  | b.d.l | 0.830 | 3.04  | 0.018 | 1.65  | 0.212 |
| ZK004-90.5-6  | PyI    | 4676 | 344   | 7.70  | 1.72  | 0.650 | 0.840 | 0.910 | 4.35  | 32.9  | 17.6  | 100  | 22.9  | 0.883 | 0.570 | 1.49  | b.d.l | 0.211 | 2.04  | b.d.l | 3.11  | b.d.l |

|               |      |      |       |       |       |      |      |      |       |       |       |       |       |       |       |       |       |       |       |       |      |       |
|---------------|------|------|-------|-------|-------|------|------|------|-------|-------|-------|-------|-------|-------|-------|-------|-------|-------|-------|-------|------|-------|
| ZK002-66.2-1  | PyII | 21.3 | 1.33  | 3.70  | 21272 | 824  | 8.61 | 352  | 3492  | 1.24  | 1.43  | 860   | 22.6  | 0.630 | 17.6  | 0.970 | 13.8  | 1.31  | 0.027 | 0.053 | 2.89 | 1.32  |
| ZK002-66.2-2  | PyII | 17.0 | 0.77  | b.d.l | 17401 | 889  | 9.32 | 45.3 | 2136  | 0.780 | 2.24  | 898   | 21.3  | 2.460 | 11.1  | 0.465 | 14.0  | 1.66  | 0.402 | 0.263 | 104  | 29.6  |
| ZK002-66.2-3  | PyII | 18.4 | 0.81  | 2.64  | 17575 | 818  | 14.3 | 29.0 | 2755  | 0.880 | b.d.l | 787   | 20.6  | 2.650 | 8.82  | 0.540 | 10.5  | 1.69  | 0.068 | 0.057 | 392  | 47.2  |
| ZK002-66.2-4  | PyII | 16.2 | 0.31  | 4.20  | 20735 | 911  | 7.08 | 22.0 | 1223  | 0.540 | 1.55  | 513   | 22.1  | 0.223 | 6.94  | 0.263 | 14.1  | 1.71  | 0.298 | 0.047 | 35.1 | 9.4   |
| ZK002-66.2-5  | PyII | 17.5 | 0.491 | 3.19  | 8590  | 1281 | 11.5 | 13.8 | 1682  | 0.480 | 1.64  | 869   | 24.9  | 7.46  | 10.1  | 0.323 | 9.13  | 1.96  | 0.213 | 0.043 | 770  | 33.7  |
| ZK002-66.2-6  | PyII | 15.8 | 0.229 | b.d.l | 32797 | 608  | 14.7 | 3.78 | 1005  | 0.407 | 1.55  | 248   | b.d.l | 0.214 | 11.9  | 0.258 | 16.9  | 0.689 | 0.287 | 0.011 | 1.01 | 0.304 |
| ZK005-202.3-1 | PyII | 23.6 | 0.468 | 3.83  | 13756 | 820  | 21.3 | 16.1 | 1269  | 0.360 | 1.56  | 206   | b.d.l | 0.136 | 5.98  | 0.341 | 11.2  | 1.43  | 0.359 | 0.013 | 4.69 | 1.89  |
| ZK005-202.3-2 | PyII | 16.1 | 0.215 | 3.12  | 15774 | 784  | 42.9 | 6.17 | 510   | 0.297 | 1.56  | 1008  | 25.6  | 0.205 | 5.56  | 0.092 | 11.4  | 2.10  | 0.312 | b.d.l | 17.7 | 4.32  |
| ZK005-202.3-3 | PyII | 15.0 | 0.31  | 4.44  | 16924 | 1865 | 142  | 29.0 | 690   | 0.300 | 1.41  | 5871  | 129   | 182   | 3.52  | 0.348 | 12.1  | 1.77  | 1.27  | 1.15  | 49.9 | 673   |
| ZK005-202.3-4 | PyII | 15.5 | 0.144 | b.d.l | 21991 | 485  | 12.8 | 14.4 | 806   | 0.295 | 1.40  | 12763 | b.d.l | 5.26  | 3.36  | 0.211 | 11.7  | 1.73  | 5.22  | 0.04  | 642  | 57.0  |
| ZK005-202.3-5 | PyII | 70.1 | 41.6  | 42.7  | 21273 | 452  | 108  | 28.5 | 245   | 0.191 | 1.32  | 14086 | 199   | 1177  | 8.71  | 0.073 | 10.8  | 1.60  | 1.43  | 5.68  | 83.4 | 44.0  |
| ZK005-202.3-6 | PyII | 15.7 | 0.227 | 4.40  | 1.46  | 560  | 22.8 | 29.3 | 885   | 0.211 | 1.49  | 10549 | 45.9  | 1.36  | 6.39  | 0.153 | b.d.l | 0.149 | 5.31  | 0.102 | 92.3 | 7.84  |
| ZK505-374.5-1 | PyII | 14.2 | 0.132 | b.d.l | 30743 | 709  | 32.4 | 11.6 | 267   | 0.087 | 1.48  | 8080  | 65.0  | 0.376 | 2.64  | 0.085 | 12.7  | 1.16  | 2.60  | b.d.l | 27.6 | 3.80  |
| ZK505-374.5-2 | PyII | 71.3 | 0.342 | 2.52  | 12572 | 736  | 34.0 | 10.4 | 303   | 0.153 | 1.43  | 4752  | 47.6  | 0.560 | 3.02  | 0.092 | 9.69  | 2.67  | 0.462 | 0.013 | 67.9 | 12.6  |
| ZK505-374.5-3 | PyII | 17.1 | 0.147 | b.d.l | 19167 | 1348 | 1874 | 361  | b.d.l | 0.240 | 2.01  | 11414 | 155   | 1157  | b.d.l | b.d.l | 12.3  | 1.54  | 4.20  | 5.26  | 58.1 | 43.8  |
| ZK505-374.5-4 | PyII | 14.5 | 0.120 | 3.54  | 19204 | 2189 | 283  | 12.7 | 238   | 0.185 | 1.41  | 5749  | b.d.l | 1.47  | 3.71  | 0.099 | 10.8  | 1.85  | 1.76  | 0.017 | 273  | 39.9  |
| ZK505-374.5-5 | PyII | 18.7 | 0.333 | b.d.l | 6608  | 3397 | 365  | 828  | 3509  | 0.244 | b.d.l | 2076  | 43.8  | 300   | 20.8  | 1.03  | b.d.l | 115   | 0.296 | 1.55  | 104  | 94.1  |
| ZK505-374.5-6 | PyII | 403  | 4.42  | 7.34  | 25707 | 526  | 56.4 | 11.1 | 813   | 0.321 | 1.42  | 6947  | b.d.l | 1.36  | 3.20  | 0.128 | 11.6  | 0.706 | 3.84  | 0.054 | 146  | 27.5  |
| ZK001-131.7-1 | PyII | 15.5 | 0.13  | b.d.l | 20341 | 805  | 50.0 | 19.2 | 515   | 0.187 | 1.29  | 15350 | 61.9  | 9.83  | 3.04  | 0.210 | 9.89  | 1.24  | 11.7  | 0.062 | 623  | 95.4  |
| ZK001-131.7-2 | PyII | 15.3 | 6.38  | 16.0  | 16506 | 850  | 39.2 | 14.5 | 474   | 0.113 | 1.36  | 9489  | 39.0  | 8.40  | 2.35  | 0.199 | 10.4  | 1.64  | 4.51  | 0.065 | 623  | 117   |
| ZK001-131.7-3 | PyII | 14.8 | 0.131 | 6.08  | 17626 | 587  | 23.3 | 39.8 | 176   | 0.289 | 1.46  | 7275  | 64.6  | 6.73  | 2.71  | 0.061 | 11.2  | 2.26  | 2.18  | 0.065 | 544  | 104   |
| ZK001-131.7-4 | PyII | 15.7 | 0.215 | 2.41  | 23970 | 817  | 13.9 | 41.6 | 2107  | 0.121 | 1.52  | 6941  | 54.4  | 4.68  | 2.87  | 0.054 | 10.7  | 1.49  | 1.61  | 0.730 | 42.8 | 7.13  |
| ZK001-131.7-5 | PyII | 14.8 | 0.101 | b.d.l | 25143 | 599  | 24.0 | 32.0 | 338   | b.d.l | 1.36  | 9518  | 47.2  | 28.0  | 1.48  | 0.059 | 10.3  | 1.95  | 2.85  | 0.372 | 3945 | 199   |
| ZK001-131.7-6 | PyII | 14.8 | 0.075 | b.d.l | 28091 | 403  | 9.25 | 29.8 | 202   | b.d.l | 1.41  | 21386 | 38.1  | 1.29  | 2.50  | 0.263 | 11.3  | 0.789 | 13.6  | 0.012 | 101  | 22.0  |

The abbreviations "b.d.l" stands for "below detection limit".
